# Supplementary material
Source: Research Square preprint supplement (doi:10.21203/rs.3.rs-8933733/v1)
Supplement: Supplementary file 1 [file b573d2d8ce6663b8b87a2e6f.docx]

**Supplemental Table 1** Cerebrovascular Diseases-related Mortality, Stratified by Sex and Race in Adult Bronchus and Lung Cancer Patients in the United States, 1999 to 2020

| Deaths | | | | | | | | | |
| --- | --- | --- | --- | --- | --- | --- | --- | --- | --- |
| Year | **Overall** | **Women** | **Men** | **NH White** | **NH Black or African American** | **NH Asian or Pacific Islander** | **NH American Indian or Alaska Native** | **Hispanic or Latino** | **Population** |
| 1999 | 621 | 288 | 333 | 554 | 56 | N/A | N/A | N/A | 180408769 |
| 2000 | 564 | 255 | 309 | 508 | 40 | N/A | N/A | 10 | 181984640 |
| 2001 | 562 | 264 | 298 | 478 | 59 | 11 | N/A | 12 | 184305128 |
| 2002 | 580 | 296 | 284 | 489 | 67 | 13 | N/A | N/A | 186208028 |
| 2003 | 525 | 264 | 261 | 460 | 48 | N/A | 0 | 10 | 188090429 |
| 2004 | 528 | 250 | 278 | 452 | 51 | N/A | N/A | 16 | 190205384 |
| 2005 | 500 | 236 | 264 | 434 | 46 | 12 | N/A | N/A | 192551384 |
| 2006 | 479 | 236 | 243 | 399 | 47 | 14 | N/A | 17 | 195019359 |
| 2007 | 489 | 236 | 253 | 420 | 48 | N/A | N/A | N/A | 197403777 |
| 2008 | 476 | 250 | 226 | 406 | 46 | N/A | N/A | 12 | 199795090 |
| 2009 | 484 | 246 | 238 | 406 | 54 | N/A | N/A | 16 | 202107016 |
| 2010 | 407 | 207 | 200 | 346 | 42 | 14 | 0 | N/A | 203891983 |
| 2011 | 452 | 228 | 224 | 388 | 35 | N/A | N/A | 16 | 206592936 |
| 2012 | 446 | 223 | 223 | 372 | 42 | N/A | N/A | 20 | 208826037 |
| 2013 | 416 | 206 | 210 | 346 | 44 | 14 | 0 | 11 | 211085314 |
| 2014 | 440 | 225 | 215 | 367 | 45 | N/A | N/A | 16 | 213809280 |
| 2015 | 426 | 210 | 216 | 351 | 43 | 14 | 0 | 16 | 216553817 |
| 2016 | 466 | 246 | 220 | 380 | 49 | 15 | N/A | 16 | 218641417 |
| 2017 | 461 | 246 | 215 | 383 | 51 | 13 | N/A | 10 | 221447331 |
| 2018 | 504 | 255 | 249 | 408 | 58 | 12 | N/A | 20 | 223311190 |
| 2019 | 580 | 311 | 269 | 446 | 81 | 26 | N/A | 23 | 224981167 |
| 2020 | 564 | 274 | 290 | 443 | 68 | 25 | N/A | 23 | 226635013 |
| Total | 10970 | 5452 | 5518 | 9236 | 1120 | 255 | 49 | 298 | 4473854489 |

NH, Non-Hispanic ; N/A= not available (unreliable or suppressed)

**Supplemental Table 2** Cerebrovascular Disease-related Mortality, Stratified by Place of Death in Adult Bronchus and Lung Cancer Patients in the United States, 1999 to 2020

| **Deaths** | | | | | |
| --- | --- | --- | --- | --- | --- |
| **Year** | **Medical**  **Facility** | **Nursing Home/Long-term**  **Care Facility** | **Hospice Facility** | **Home** | **Other** |
| 1999 | 433 | 111 | N/A | 65 | 12 |
| 2000 | 377 | 105 | N/A | 68 | 14 |
| 2001 | 381 | 113 | N/A | 55 | 13 |
| 2002 | 388 | 105 | N/A | 60 | 27 |
| 2003 | 334 | 102 | N/A | 62 | 22 |
| 2004 | 333 | 95 | N/A | 72 | 21 |
| 2005 | 296 | 105 | 12 | 63 | 24 |
| 2006 | 274 | 97 | 19 | 70 | 17 |
| 2007 | 307 | 78 | 32 | 57 | 15 |
| 2008 | 278 | 79 | 25 | 58 | 24 |
| 2009 | 279 | 77 | 43 | 62 | 11 |
| 2010 | 237 | 58 | 37 | 55 | 20 |
| 2011 | 254 | 73 | 48 | 56 | 21 |
| 2012 | 266 | 63 | 47 | 55 | 15 |
| 2013 | 226 | 54 | 49 | 61 | 25 |
| 2014 | 240 | 64 | 57 | 61 | 18 |
| 2015 | 243 | 53 | 61 | 58 | 11 |
| 2016 | 252 | 75 | 72 | 57 | 10 |
| 2017 | 255 | 52 | 81 | 67 | N/A |
| 2018 | 276 | 56 | 88 | 77 | N/A |
| 2019 | 334 | 68 | 83 | 81 | 14 |
| 2020 | 280 | 63 | 96 | 114 | 11 |
| **Total** | 6543 | 1746 | 854 | 1434 | 358 |

N/A= not available (unreliable or suppressed)

**Supplemental Table 3** Annual percent change (APC) of Cerebrovascular Diseases–related Age-Adjusted Mortality Rates per 100,000 in Adult Bronchus and Lung Cancer Patients in the United States, 1999 to 2020

| Year Interval | APC (95% CI) | P value |
| --- | --- | --- |
| Overall | | |
| 1999-2014 | -4.41 (-4.87,-3.94) | ＜0.001 |
| 2014-2020 | 2.66 (0.08,5.31) | 0.044 |
| Men | | |
| 1999-2015 | -5.28 (-5.82,-4.74) | ＜0.001 |
| 2015-2020 | 4.01 (0.54,7.59) | 0.026 |
| Women | | |
| 1999-2014 | -3.82 (-4.75,-2.87) | ＜0.001 |
| 2014-2020 | 3.71 (-0.29,7.87) | 0.067 |
| Younger Group (＜65 years old) | | |
| 1999-2020 | -0.13 (-0.83,0.57) | 0.697 |
| Older Group (≥65 years old) | | |
| 1999-2013 | -4.55 (-5.33,-3.77) | ＜0.001 |
| 2013-2020 | 1.27 (-1.02,3.61) | 0.260 |
| NH American Indian or Alaska Native | | |
| 1999-2020 | N/A | N/A |
| NH Black or African American | | |
| 1999-2016 | -4.20 (-5.65,-2.73) | ＜0.001 |
| 2016-2020 | 12.45 (-0.85,27.54) | 0.066 |
| Hispanic or Latino | | |
| 1999-2020 | N/A | N/A |
| NH Asian or Pacific Islander | | |
| 1999-2020 | N/A | N/A |
| NH White | | |
| 1999-2013 | -4.56 (-5.18,-3.95) | ＜0.001 |
| 2013-2020 | 1.48 (-0.46,3.46) | 0.126 |
| Non-metropolitan areas | | |
| 1999-2020 | -2.30 (-3.22,-1.38) | ＜0.001 |
| Metropolitan areas | | |
| 1999-2015 | -4.38 (-5.01,-3.75) | ＜0.001 |
| 2015-2020 | 4.57 (0.70,8.60) | 0.023 |
| Northeast | | |
| 1999-2015 | -4.76 (-6.00,-3.51) | ＜0.001 |
| 2015-2020 | 5.25 (-3.00,14.20) | 0.204 |
| Midwest | | |
| 1999-2013 | -4.13 (-5.36,-2.89) | ＜0.001 |
| 2013-2020 | 1.71 (-2.10,5.67) | 0.363 |
| South | | |
| 1999-2013 | -4.30 (-5.25,-3.33) | ＜0.001 |
| 2013-2020 | 1.63 (-1.25,4.59) | 0.251 |
| West | | |
| 1999-2017 | -4.30 (-5.14,-3.46) | ＜0.001 |
| 2017-2020 | 12.13 (-1.07,27.09) | 0.071 |
|  | **Bronchus and Lung Cancer and CEVDs (Hemorrhagic Stroke [I60-I62])** |  |
| 1999-2020 | -1.90 (-3.05,-0.74) | 0.003 |
|  | **Bronchus and Lung Cancer and CEVDs (Cerebral Infarction [I63])** |  |
| 1999-2015 | -3.93 (-5.68,-2.16) | ＜0.001 |
| 2015-2018 | 50.37 (5.64,114.03) | 0.027 |
| 2018-2020 | -19.50 (-38.63,5.58) | 0.108 |
| AAPC | 0.71 (-4.53,6.22) | 0.796 |
|  | **Bronchus and Lung Cancer and CEVDs (Stroke, Unspecified [I64])** |  |
| 1999-2020 | -4.46 (-5.00,-3.92) | ＜0.001 |
|  | **Bronchus and Lung Cancer and CEVDs (Other Cerebrovascular Diseases [I67, I69])** |  |
| 1999-2012 | -5.70 (-8.28,-3.05) | ＜0.001 |
| 2012-2020 | 6.05 (-0.88,13.47) | 0.084 |
| AAPC | -1.39 (-4.18,1.49) | 0.341 |

APC = Annual percent change; AAPC = Average annual percent change; NH = Non-Hispanic; N/A = Not available (unreliable or suppressed)

**Supplemental Table 4** Overall and Sex‐Stratified Cerebrovascular Diseases-related Age-Adjusted Mortality Rates per 100,000 in Adult Bronchus and Lung Cancer Patients in the United States from 1999 to 2020

| Age-Adjusted Rate (95% CI) | | | |
| --- | --- | --- | --- |
| Year | **Men** | **Women** | **Overall** |
| 1999 | 0.47 (0.42-0.52) | 0.26 (0.23-0.29) | 0.34 (0.31-0.36) |
| 2000 | 0.42 (0.37-0.47) | 0.24 (0.21-0.28) | 0.31 (0.28-0.34) |
| 2001 | 0.40 (0.36-0.45) | 0.25 (0.22-0.28) | 0.32 (0.30-0.35) |
| 2002 | 0.38 (0.33-0.42) | 0.28 (0.25-0.31) | 0.31 (0.29-0.34) |
| 2003 | 0.34 (0.30-0.38) | 0.25 (0.22-0.28) | 0.28 (0.25-0.30) |
| 2004 | 0.35 (0.31-0.39) | 0.24 (0.21-0.27) | 0.27 (0.24-0.29) |
| 2005 | 0.33 (0.29-0.37) | 0.21 (0.18-0.23) | 0.26 (0.24-0.29) |
| 2006 | 0.28 (0.25-0.32) | 0.20 (0.17-0.22) | 0.24 (0.21-0.26) |
| 2007 | 0.29 (0.25-0.33) | 0.18 (0.16-0.21) | 0.24 (0.22-0.26) |
| 2008 | 0.27 (0.23-0.30) | 0.20 (0.18-0.23) | 0.22 (0.20-0.24) |
| 2009 | 0.26 (0.23-0.29) | 0.20 (0.17-0.23) | 0.23 (0.21-0.25) |
| 2010 | 0.22 (0.19-0.25) | 0.16 (0.14-0.19) | 0.19 (0.17-0.20) |
| 2011 | 0.24 (0.20-0.27) | 0.17 (0.15-0.20) | 0.20 (0.18-0.22) |
| 2012 | 0.23 (0.20-0.26) | 0.16 (0.14-0.18) | 0.19 (0.17-0.21) |
| 2013 | 0.22 (0.19-0.25) | 0.15 (0.13-0.18) | 0.18 (0.16-0.20) |
| 2014 | 0.21 (0.18-0.24) | 0.16 (0.14-0.18) | 0.18 (0.16-0.19) |
| 2015 | 0.19 (0.16-0.21) | 0.16 (0.13-0.18) | 0.17 (0.16-0.19) |
| 2016 | 0.20 (0.17-0.23) | 0.16 (0.14-0.18) | 0.19 (0.18-0.21) |
| 2017 | 0.18 (0.15-0.20) | 0.18 (0.15-0.20) | 0.17 (0.16-0.19) |
| 2018 | 0.22 (0.19-0.25) | 0.16 (0.14-0.18) | 0.20 (0.18-0.22) |
| 2019 | 0.21 (0.19-0.24) | 0.21 (0.18-0.23) | 0.20 (0.18-0.22) |
| 2020 | 0.23 (0.21-0.26) | 0.18 (0.16-0.20) | 0.20 (0.18-0.21) |
| Overall | 0.27 (0.26-0.27) | 0.20 (0.19-0.20) | 0.22 (0.22-0.23) |

**Supplemental Table 5** Cerebrovascular Diseases-related Mortality, Stratified by Age group in Adult Bronchus and Lung Cancer Patients in the United States, 1999 to 2020

|  | **Deaths** | | **Age-Adjusted Rate (95% CI)** | |
| --- | --- | --- | --- | --- |
| **Year** | **Younger Group** | **Older Group** | **Younger Group** | **Older Group** |
| 1999 | 96 | 525 | 0.05 (0.04-0.06) | 1.52 (1.39-1.65) |
| 2000 | 68 | 496 | 0.03 (0.03-0.04) | 1.45 (1.32-1.57) |
| 2001 | 86 | 476 | 0.08 (0.06-0.10) | 1.35 (1.23-1.47) |
| 2002 | 87 | 493 | 0.06 (0.05-0.07) | 1.37 (1.25-1.49) |
| 2003 | 73 | 452 | 0.03 (0.03-0.04) | 1.29 (1.17-1.41) |
| 2004 | 83 | 445 | 0.03 (0.03-0.04) | 1.23 (1.12-1.35) |
| 2005 | 64 | 436 | 0.03 (0.02-0.04) | 1.21 (1.09-1.32) |
| 2006 | 82 | 397 | 0.03 (0.03-0.04) | 1.06 (0.96-1.17) |
| 2007 | 75 | 414 | 0.03 (0.03-0.04) | 1.09 (0.99-1.20) |
| 2008 | 88 | 388 | 0.03 (0.03-0.04) | 0.99 (0.89-1.09) |
| 2009 | 82 | 402 | 0.03 (0.03-0.04) | 1.04 (0.93-1.14) |
| 2010 | 74 | 333 | 0.03 (0.03-0.04) | 0.81 (0.72-0.90) |
| 2011 | 79 | 373 | 0.03 (0.03-0.04) | 0.89 (0.80-0.99) |
| 2012 | 72 | 374 | 0.02 (0.01-0.02) | 0.91 (0.81-1.00) |
| 2013 | 78 | 338 | 0.03 (0.03-0.04) | 0.78 (0.69-0.86) |
| 2014 | 71 | 369 | 0.02 (0.01-0.02) | 0.84 (0.75-0.92) |
| 2015 | 96 | 330 | 0.03 (0.03-0.04) | 0.75 (0.67-0.83) |
| 2016 | 80 | 386 | 0.03 (0.03-0.04) | 0.86 (0.77-0.94) |
| 2017 | 88 | 373 | 0.03 (0.03-0.04) | 0.74 (0.66-0.81) |
| 2018 | 77 | 427 | 0.03 (0.03-0.04) | 0.88 (0.80-0.97) |
| 2019 | 116 | 464 | 0.03 (0.03-0.04) | 0.89 (0.81-0.97) |
| 2020 | 90 | 474 | 0.03 (0.03-0.04) | 0.87 (0.79-0.95) |
| **Overall** | 1805 | 9165 | 0.03 (0.03-0.04) | 1.01 (0.99-1.03) |

Younger Group= 25-64years; Older Group= 65 years and above; N/A = not available (unreliable or suppressed)

**Supplemental Table 6** Cerebrovascular Diseases-related Age-Adjusted Mortality Rates per 100,000 stratified by Race in Adult Bronchus and Lung Cancer Patients in the United States from 1999 to 2020

| Age-Adjusted Rate (95% CI) | | | | | |
| --- | --- | --- | --- | --- | --- |
| Year | **NH White** | **NH Black or African American** | **NH American Indian or Alaska Native** | **Hispanic or Latino** | **NH Asian or Pacific Islander** |
| 1999 | 0.38 (0.35-0.41) | 0.37 (0.27-0.48) | N/A | N/A | N/A |
| 2000 | 0.34 (0.31-0.37) | 0.27 (0.19-0.37) | N/A | Unreliable (0.05-0.21) | N/A |
| 2001 | 0.30 (0.27-0.33) | 0.37 (0.28-0.48) | N/A | Unreliable (0.05-0.19) | Unreliable (0.13-0.48) |
| 2002 | 0.32 (0.29-0.35) | 0.43 (0.33-0.55) | N/A | N/A | Unreliable (0.15-0.52) |
| 2003 | 0.29 (0.26-0.31) | 0.30 (0.22-0.40) | Unreliable (0.00-0.00) | Unreliable (0.03-0.15) | N/A |
| 2004 | 0.27 (0.25-0.30) | 0.29 (0.22-0.39) | N/A | Unreliable (0.08-0.26) | N/A |
| 2005 | 0.27 (0.24-0.30) | 0.29 (0.21-0.39) | N/A | N/A | Unreliable (0.11-0.38) |
| 2006 | 0.25 (0.22-0.27) | 0.26 (0.19-0.35) | N/A | Unreliable (0.08-0.23) | Unreliable (0.14-0.43) |
| 2007 | 0.26 (0.23-0.29) | 0.28 (0.20-0.37) | N/A | N/A | N/A |
| 2008 | 0.23 (0.21-0.25) | 0.24 (0.17-0.32) | N/A | Unreliable (0.04-0.15) | N/A |
| 2009 | 0.23 (0.21-0.25) | 0.29 (0.21-0.38) | N/A | Unreliable (0.06-0.18) | N/A |
| 2010 | 0.21 (0.18-0.23) | 0.22 (0.16-0.31) | Unreliable (0.00-0.00) | N/A | Unreliable (0.08-0.30) |
| 2011 | 0.22 (0.20-0.24) | 0.18 (0.12-0.26) | N/A | Unreliable (0.05-0.17) | N/A |
| 2012 | 0.20 (0.18-0.22) | 0.20 (0.14-0.27) | N/A | 0.13 (0.08-0.20) | N/A |
| 2013 | 0.19 (0.17-0.21) | 0.20 (0.15-0.28) | Unreliable (0.00-0.00) | Unreliable (0.04-0.13) | Unreliable (0.08-0.25) |
| 2014 | 0.19 (0.17-0.21) | 0.20 (0.15-0.28) | N/A | Unreliable (0.05-0.14) | N/A |
| 2015 | 0.17 (0.16-0.19) | 0.19 (0.13-0.25) | Unreliable (0.00-0.00) | Unreliable (0.03-0.11) | Unreliable (0.07-0.22) |
| 2016 | 0.20 (0.18-0.22) | 0.20 (0.14-0.27) | N/A | Unreliable (0.04-0.11) | Unreliable (0.05-0.18) |
| 2017 | 0.20 (0.18-0.22) | 0.18 (0.13-0.24) | N/A | Unreliable (0.02-0.09) | Unreliable (0.05-0.18) |
| 2018 | 0.20 (0.18-0.22) | 0.23 (0.17-0.30) | N/A | 0.09 (0.05-0.14) | Unreliable (0.04-0.16) |
| 2019 | 0.21 (0.19-0.22) | 0.31 (0.24-0.39) | N/A | 0.09 (0.06-0.14) | 0.18 (0.12-0.27) |
| 2020 | 0.20 (0.18-0.22) | 0.25 (0.19-0.32) | N/A | 0.09 (0.06-0.14) | 0.18 (0.12-0.27) |
| Overall | 0.23 (0.23-0.24) | 0.27 (0.25 0.29) | 0.20 (0.14-0.27) | 0.09 (0.08-0.10) | 0.14 (0.12-0.16) |

NH=Non-Hispanic ; N/A= not available (unreliable or suppressed)

**Supplemental Table 7** Cerebrovascular Diseases-related Age-Adjusted Mortality Rates per 100,000 Stratified by State in Adult Bronchus and Lung Cancer Patients in the United States, 1999 to 2020

| State | Age-Adjusted Rate (95% CI) |
| --- | --- |
| Alabama | 0.24 (0.21-0.28) |
| Alaska | 0.41 (0.26-0.62) |
| Arizona | 0.14 (0.12-0.17) |
| Arkansas | 0.25 (0.20-0.29) |
| California | 0.24 (0.23-0.25) |
| Colorado | 0.21 (0.17-0.24) |
| Connecticut | 0.24 (0.20-0.28) |
| Delaware | 0.28 (0.20-0.38) |
| District of Columbia | Unreliable (0.09-0.27) |
| Florida | 0.15 (0.14-0.17) |
| Georgia | 0.20 (0.18-0.23) |
| Hawaii | 0.22 (0.16-0.29) |
| Idaho | 0.24 (0.18-0.31) |
| Illinois | 0.23 (0.21-0.26) |
| Indiana | 0.29 (0.25-0.32) |
| Iowa | 0.24 (0.20-0.28) |
| Kansas | 0.27 (0.22-0.32) |
| Kentucky | 0.24 (0.21-0.28) |
| Louisiana | 0.12 (0.10-0.15) |
| Maine | 0.24 (0.18-0.31) |
| Maryland | 0.28 (0.24-0.31) |
| Massachusetts | 0.20 (0.18-0.23) |
| Michigan | 0.20 (0.18-0.22) |
| Minnesota | 0.28 (0.24-0.32) |
| Mississippi | 0.34 (0.28-0.39) |
| Missouri | 0.26 (0.22-0.29) |
| Montana | 0.25 (0.18-0.34) |
| Nebraska | 0.26 (0.21-0.33) |
| Nevada | 0.11 (0.08-0.15) |
| New Hampshire | 0.21 (0.15-0.28) |
| New Jersey | 0.19 (0.16-0.21) |
| New Mexico | 0.14 (0.10-0.19) |
| New York | 0.17 (0.15-0.18) |
| North Carolina | 0.29 (0.26-0.32) |
| North Dakota | 0.31 (0.21-0.43) |
| Ohio | 0.29 (0.26-0.31) |
| Oklahoma | 0.34 (0.29-0.39) |
| Oregon | 0.29 (0.25-0.33) |
| Pennsylvania | 0.20 (0.18-0.22) |
| Rhode Island | 0.31 (0.23-0.40) |
| South Carolina | 0.24 (0.21-0.28) |
| South Dakota | 0.22 (0.15-0.31) |
| Tennessee | 0.27 (0.24-0.31) |
| Texas | 0.25 (0.24-0.27) |
| Utah | 0.07 (0.05-0.11) |
| Vermont | 0.31 (0.22-0.43) |
| Virginia | 0.19 (0.17-0.22) |
| Washington | 0.34 (0.30-0.38) |
| West Virginia | 0.25 (0.19-0.31) |
| Wisconsin | 0.28 (0.24-0.31) |
| Wyoming | 0.27 (0.17-0.41) |
| Overall | 0.22 (0.22-0.23) |

**Supplemental Table 8** Cerebrovascular Diseases-related Age-Adjusted Mortality Rate per 100,000 Stratified by Census Region in Adult Bronchus and Lung Cancer Patients in the United States 1999-2020

| Age-Adjusted Rate (95% CI) | | | | |
| --- | --- | --- | --- | --- |
| Year | **Census Region 1: Northeast** | **Census Region 2: Midwest** | **Census Region 3: South** | **Census Region 4: West** |
| 1999 | 0.32 (0.26-0.38) | 0.35 (0.30-0.41) | 0.38 (0.33-0.43) | 0.32 (0.26-0.38) |
| 2000 | 0.29 (0.24-0.35) | 0.37 (0.31-0.43) | 0.30 (0.26-0.34) | 0.29 (0.23-0.35) |
| 2001 | 0.26 (0.21-0.31) | 0.31 (0.26-0.37) | 0.32 (0.27-0.37) | 0.35 (0.29-0.41) |
| 2002 | 0.25 (0.20-0.30) | 0.33 (0.27-0.38) | 0.33 (0.28-0.37) | 0.35 (0.29-0.41) |
| 2003 | 0.24 (0.19-0.29) | 0.34 (0.28-0.39) | 0.26 (0.22-0.30) | 0.30 (0.24-0.35) |
| 2004 | 0.25 (0.20-0.30) | 0.30 (0.25-0.36) | 0.26 (0.22-0.30) | 0.28 (0.22-0.33) |
| 2005 | 0.18 (0.14-0.23) | 0.33 (0.27-0.38) | 0.25 (0.21-0.29) | 0.30 (0.24-0.35) |
| 2006 | 0.23 (0.19-0.28) | 0.28 (0.23-0.33) | 0.24 (0.21-0.28) | 0.22 (0.17-0.27) |
| 2007 | 0.19 (0.15-0.24) | 0.27 (0.22-0.32) | 0.24 (0.20-0.27) | 0.24 (0.19-0.28) |
| 2008 | 0.19 (0.15-0.24) | 0.26 (0.21-0.31) | 0.24 (0.20-0.27) | 0.23 (0.19-0.28) |
| 2009 | 0.21 (0.17-0.26) | 0.24 (0.20-0.29) | 0.23 (0.20-0.27) | 0.23 (0.19-0.28) |
| 2010 | 0.16 (0.12-0.20) | 0.18 (0.14-0.22) | 0.19 (0.16-0.23) | 0.19 (0.15-0.24) |
| 2011 | 0.12 (0.09-0.16) | 0.26 (0.21-0.30) | 0.21 (0.17-0.24) | 0.22 (0.18-0.27) |
| 2012 | 0.18 (0.14-0.22) | 0.20 (0.16-0.24) | 0.23 (0.19-0.26) | 0.20 (0.16-0.25) |
| 2013 | 0.16 (0.12-0.20) | 0.20 (0.16-0.24) | 0.16 (0.13-0.19) | 0.18 (0.14-0.22) |
| 2014 | 0.15 (0.12-0.19) | 0.22 (0.18-0.27) | 0.19 (0.16-0.22) | 0.19 (0.15-0.23) |
| 2015 | 0.14 (0.11-0.18) | 0.23 (0.18-0.27) | 0.19 (0.16-0.22) | 0.16 (0.13-0.20) |
| 2016 | 0.13 (0.10-0.17) | 0.20 (0.16-0.24) | 0.22 (0.19-0.25) | 0.17 (0.14-0.21) |
| 2017 | 0.18 (0.14-0.22) | 0.21 (0.17-0.25) | 0.19 (0.16-0.22) | 0.15 (0.12-0.19) |
| 2018 | 0.14 (0.11-0.18) | 0.21 (0.17-0.25) | 0.20 (0.17-0.23) | 0.20 (0.16-0.23) |
| 2019 | 0.18 (0.14-0.22) | 0.26 (0.22-0.30) | 0.20 (0.17-0.23) | 0.19 (0.16-0.23) |
| 2020 | 0.17 (0.14-0.21) | 0.22 (0.18-0.26) | 0.21 (0.18-0.24) | 0.22 (0.18-0.26) |
| Overall | 0.19 (0.18-0.20) | 0.24 (0.23-0.25) | 0.22 (0.22-0.23) | 0.22 (0.21-0.23) |

**Supplemental Table 9** Overall Cerebrovascular Diseases–related Age-Adjusted Mortality Rates per 100,000 in Adult Bronchus and Lung Cancer Patients in the Metropolitan and Non-metropolitan areas in the United States, 1999 to 2020

| Age-Adjusted Rate (95% CI) | | |
| --- | --- | --- |
| Year | **Metropolitan** | **Nonmetropolitan** |
| 1999 | 0.32 (0.29-0.35) | 0.39 (0.33-0.46) |
| 2000 | 0.30 (0.27-0.33) | 0.33 (0.27-0.39) |
| 2001 | 0.31 (0.28-0.34) | 0.27 (0.22-0.33) |
| 2002 | 0.30 (0.27-0.32) | 0.35 (0.29-0.41) |
| 2003 | 0.28 (0.25-0.30) | 0.30 (0.24-0.36) |
| 2004 | 0.26 (0.23-0.28) | 0.32 (0.26-0.38) |
| 2005 | 0.25 (0.22-0.27) | 0.30 (0.25-0.36) |
| 2006 | 0.22 (0.20-0.25) | 0.26 (0.21-0.31) |
| 2007 | 0.23 (0.21-0.26) | 0.28 (0.23-0.34) |
| 2008 | 0.21 (0.19-0.23) | 0.30 (0.24-0.36) |
| 2009 | 0.22 (0.20-0.25) | 0.19 (0.15-0.24) |
| 2010 | 0.17 (0.15-0.19) | 0.20 (0.16-0.25) |
| 2011 | 0.19 (0.17-0.21) | 0.25 (0.21-0.31) |
| 2012 | 0.19 (0.17-0.21) | 0.21 (0.17-0.26) |
| 2013 | 0.18 (0.16-0.20) | 0.19 (0.15-0.24) |
| 2014 | 0.16 (0.14-0.18) | 0.24 (0.20-0.29) |
| 2015 | 0.15 (0.14-0.17) | 0.20 (0.16-0.25) |
| 2016 | 0.19 (0.17-0.21) | 0.22 (0.18-0.27) |
| 2017 | 0.16 (0.14-0.18) | 0.24 (0.19-0.29) |
| 2018 | 0.18 (0.16-0.19) | 0.22 (0.18-0.27) |
| 2019 | 0.20 (0.18-0.22) | 0.25 (0.21-0.30) |
| 2020 | 0.19 (0.18-0.21) | 0.23 (0.18-0.27) |
| Overall | 0.21 (0.21-0.22) | 0.25 (0.24-0.26) |
